# Supplementary material for: Performance enhancement in SOECs with a novel waveform flow channel
Source: Royal Society of Chemistry journal article supplement (doi:10.1039/d5cc06779k), 2026-01-01
Supplement: d5cc06779k1.pdf [file d5cc06779k1.pdf]

## Supplementary Information

### 1. Experimental process

Tables 1 and 2 list the cell structural parameters and experimental operating conditions, respectively.

Table 1 Structural parameters

| Parameter                       | Value  | Unit          |
|---------------------------------|--------|---------------|
| Cell length                     | 100    | mm            |
| Cell width                      | 100    | mm            |
| Cathode thickness               | 400    | $\mu\text{m}$ |
| Electrolyte thickness           | 10     | $\mu\text{m}$ |
| Anode thickness                 | 20     | $\mu\text{m}$ |
| Flow channel length             | 80     | mm            |
| Flow channel depth              | 1      | mm            |
| Parallel flow channel width     | 2      | mm            |
| Waveform flow channel amplitude | 0.5    | mm            |
| Waveform flow channel period    | $2\pi$ | -             |
| Rid width                       | 1      | mm            |

Table 2 Operation conditions

| Parameter                       | Value                                      | Unit          |
|---------------------------------|--------------------------------------------|---------------|
| Cathode inlet gas composition   | 80% $\text{H}_2\text{O}$ +20% $\text{H}_2$ | mm            |
| Cathode inlet gas flow velocity | 0.5                                        | slm           |
| Anode inlet gas composition     | Air                                        | $\text{mm}^2$ |
| Anode inlet gas flow velocity   | 1.22                                       | slm           |

|                    |         |                   |
|--------------------|---------|-------------------|
| Cell temperature   | 1023.15 | K                 |
| Operating pressure | 1       | bar               |
| Current density    | 0-1     | A/cm <sup>2</sup> |

---

## 2 Modeling approach

To reduce computational complexity and emphasize multiphysics phenomena in the reaction region, the following reasonable assumptions were adopted:

- (1) The gas behaves ideally, neglecting intermolecular interactions.
- (2) The SOEC operates under steady-state conditions.
- (3) The effects of gravity on the cell and gas flow are negligible;
- (4) All materials exhibit isotropic properties.
- (5) Physical quantities such as temperature and pressure are uniformly distributed at each model node.

## 3 Evaluation indicators

Uniformity indicators are employed to evaluate the distribution uniformity of multiphysics fields, such as flow and electrochemical reactions. For example, the temperature distribution can be assessed using the following uniformity index:

$$u_x = \left\{ \frac{1}{n} \sum_{i=1}^n \left[ \frac{(u_i - u_{avg})}{u_{avg}} \right]^2 \right\} \quad (1)$$

where  $u_i$  is the local temperature at point  $i$ ,  $u_{avg}$  is the average temperature across all  $n$  measurement points, and  $u_x$  represents the temperature uniformity index. A lower  $u_x$  value indicates improved temperature uniformity.

## 4 Model validation

Fig. 1(a) compares the experimental data with the simulation results for the single cell equipped with both a parallel flow channel and a waveform flow channel. The numerical predictions show excellent agreement with the

experimental measurements across the entire range of tested current densities, with the relative deviation maintained at less than 6%. In addition, Fig. 1(b) presents the temperature rise at nine measurement points on the cell at 0.5 A/cm<sup>2</sup>, relative to the initial cell temperature, under both experimental and simulated conditions. The results indicate that the temperature trend predicted by the model closely matches the experimental data. The maximum temperature error does not exceed 2 K, and the relative error remains within 0.2%, primarily due to the measurement error of the thermocouple and the sealing performance of the cell. This high degree of accuracy validates the model's robustness and reliability, supporting its applicability for further SOEC-related investigations.

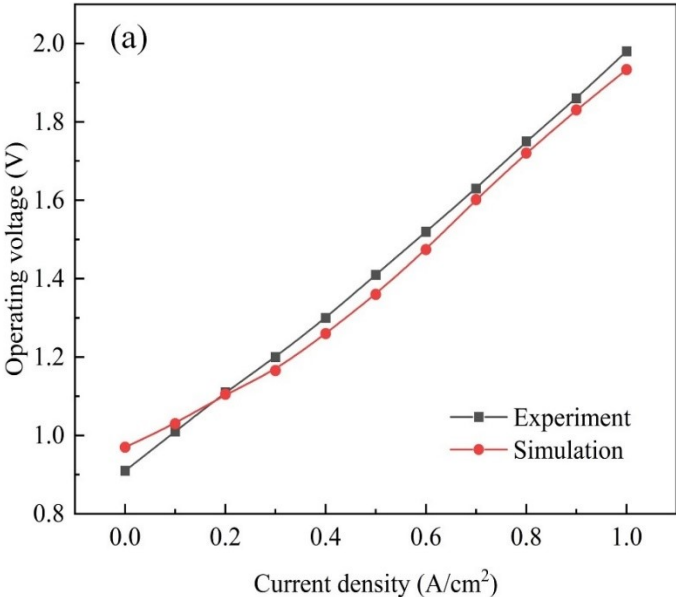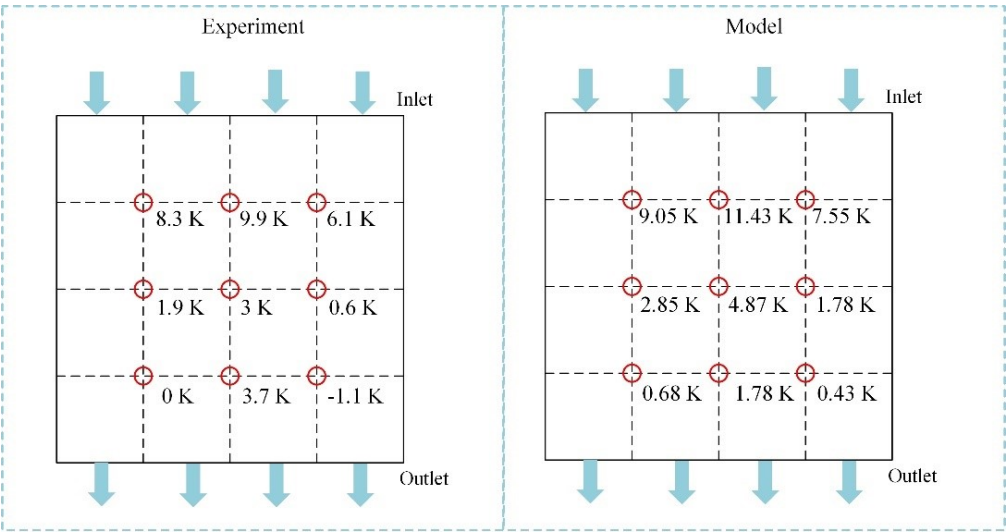

**Fig. 1** Model validation: (a) comparison of polarization curves obtained from experimental data and simulation results and (b) temperature distribution comparison at nine measurement points under  $0.5 \text{ A/cm}^2$
